# Supplementary material
Source: Springer Nature journal article supplement (https://www.springermedizin.de/resource/supplementary/12883_2011_506_MOESM8_ESM.pdf/9455290)
Supplement: MOESM8 [file 9455290]

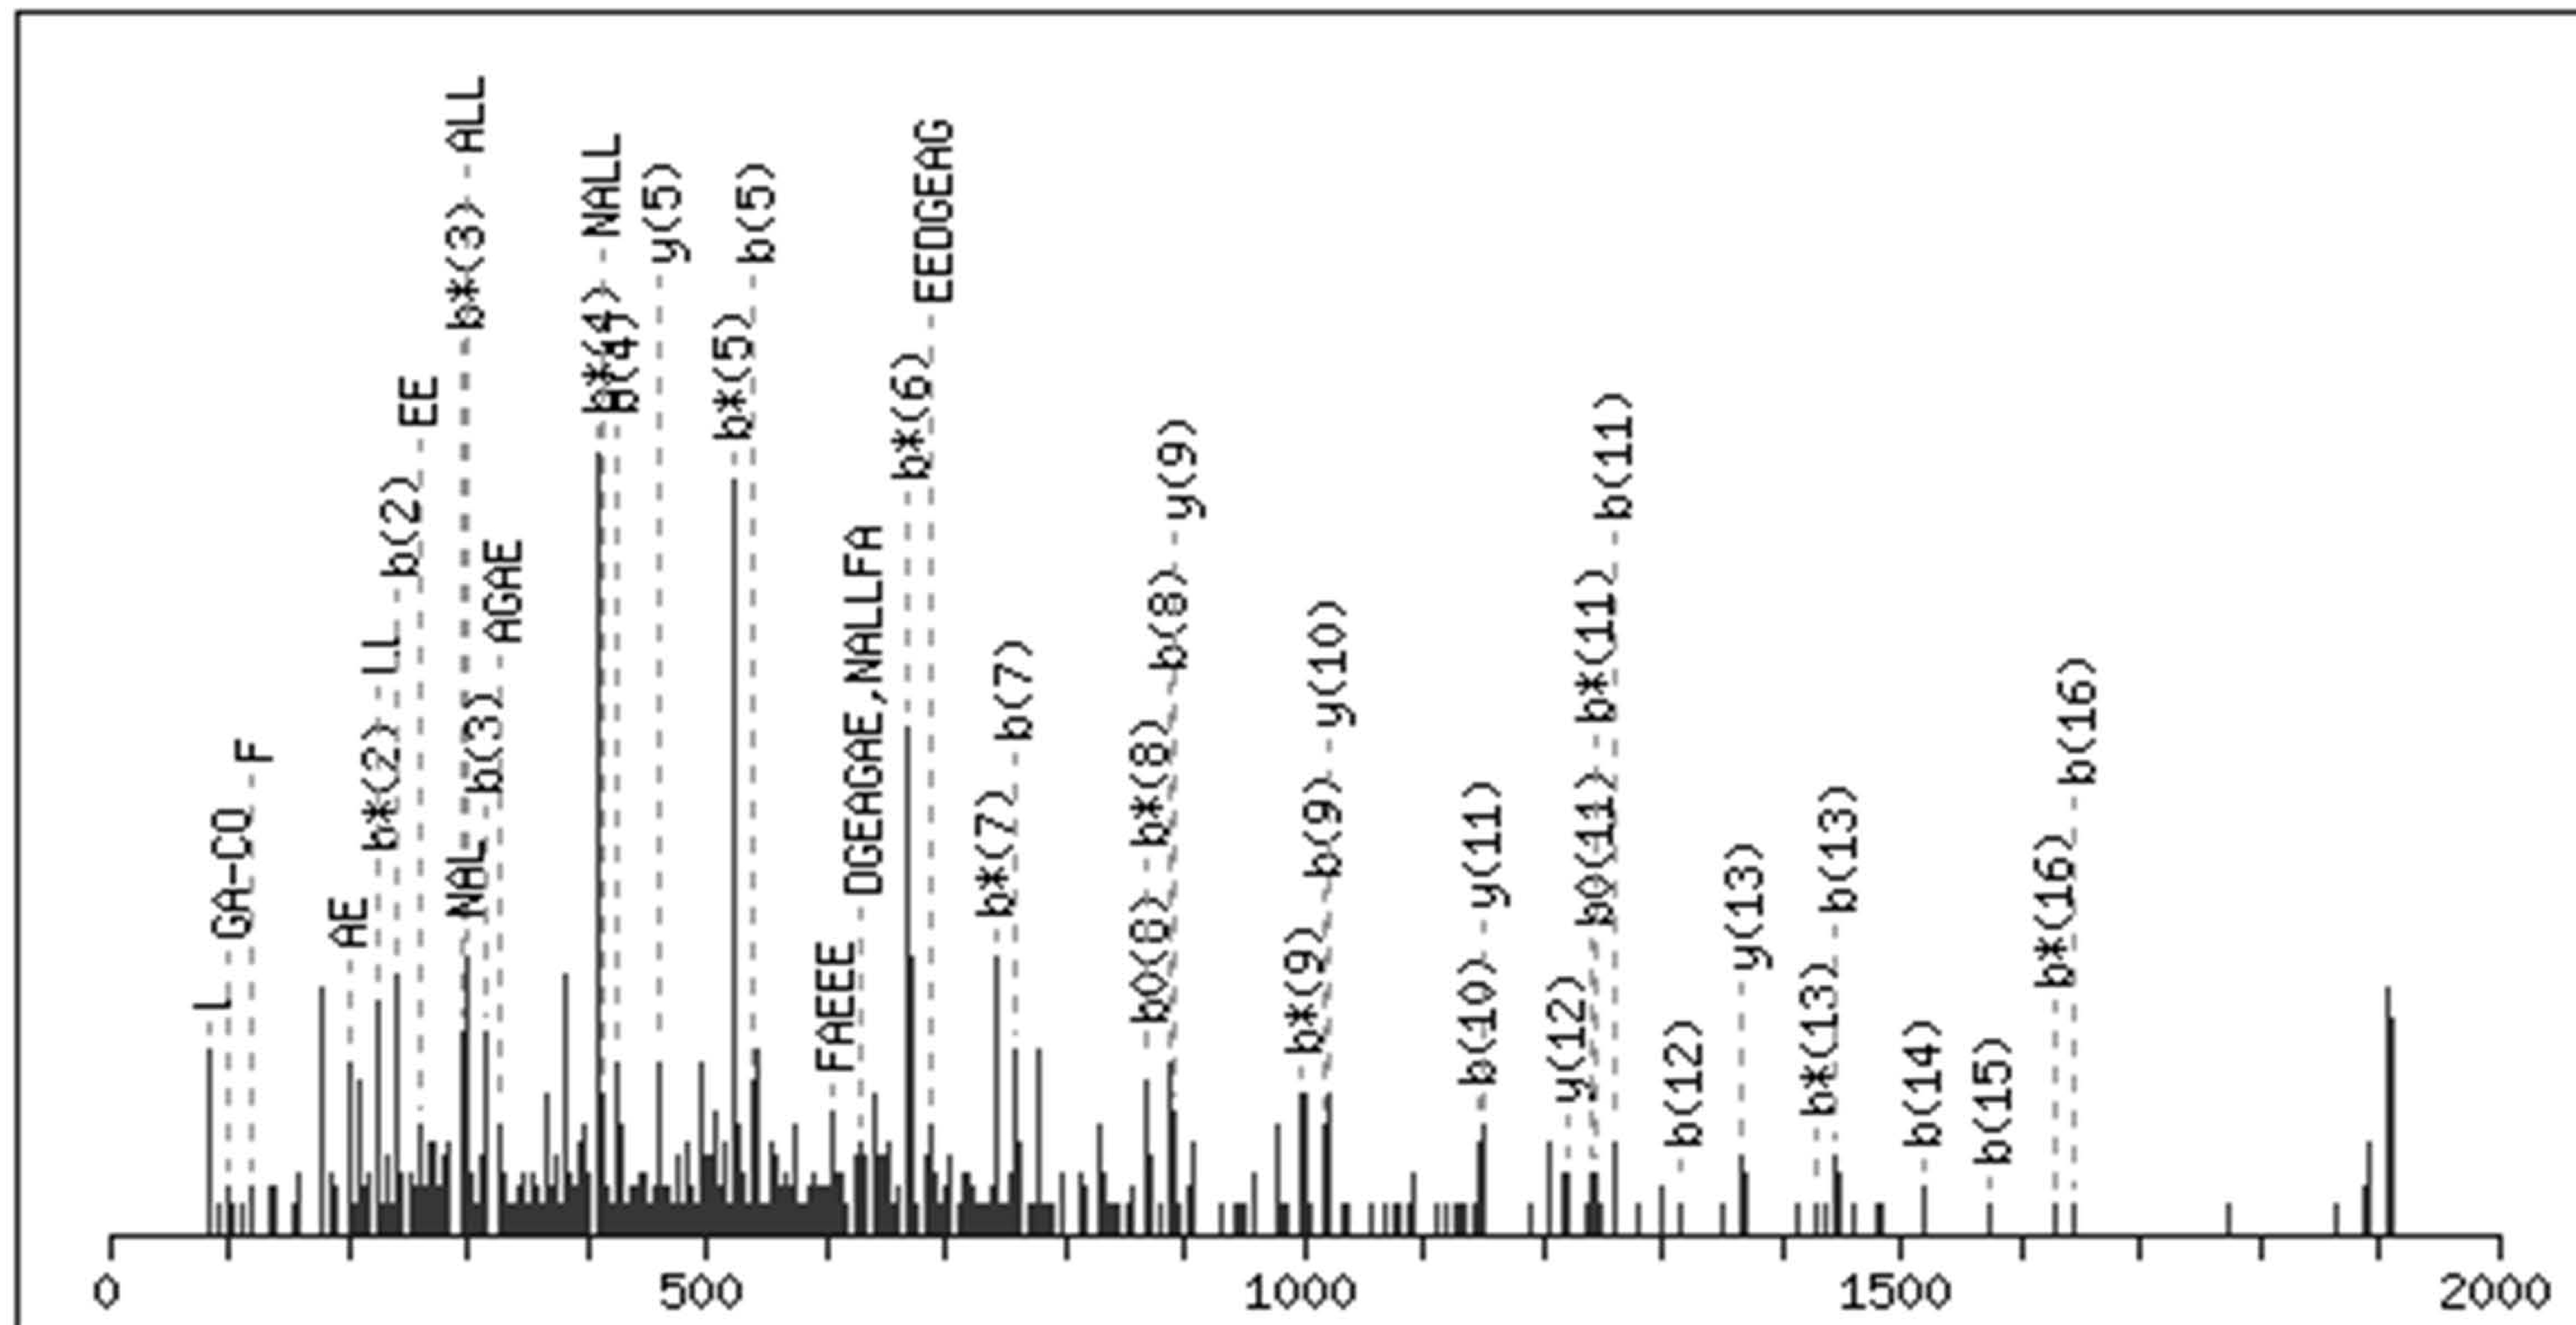

Monoisotopic mass of neutral peptide Mr(calc): 1906.8068

Ions Score: 62 Expect: 0.0031

Matches : 56/230 fragment ions using 123 most intense peaks ([help](#))
